# Supplementary material for: Hybrid lanthanide nanoparticles as a new class of binary contrast agents for in vivo T1/T2 dual-weighted MRI and synergistic tumor diagnosis
Source: Royal Society of Chemistry journal article supplement (doi:10.1039/c5tb02375k), 2016-01-01
Supplement: c5tb02375k1.pdf [file c5tb02375k1.pdf]

## Supporting Information

### *Hybrid lanthanide nanoparticles as a new class of binary contrast agents for in vivo $T_1/T_2$ dual-weighted MRI and synergistic tumor diagnosis*

Zhigao Yi,<sup>a,b,d</sup> Xiaolong Li,<sup>a,d</sup> Wei Lu,<sup>c</sup> Hongrong Liu,<sup>a</sup> Songjun Zeng,<sup>\*a</sup> and Jianhua Hao<sup>\*c</sup>

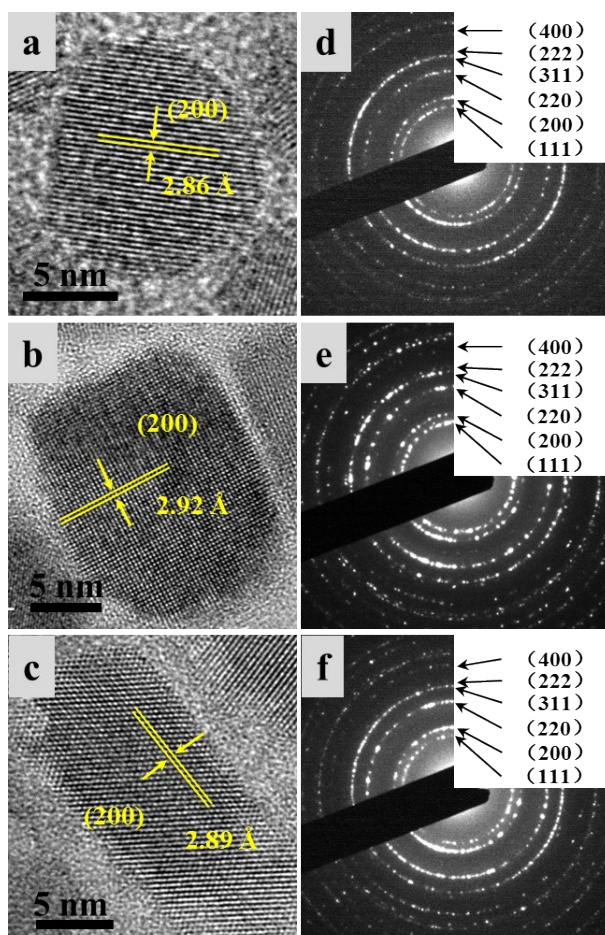

**Figure S1.** (a-c) HR-TEM images and (d-f) SAED patterns of BaGdF<sub>5</sub>:50 mol%Ln<sup>3+</sup> NPs (Ln<sup>3+</sup> = Dy<sup>3+</sup>, Er<sup>3+</sup>, or Yb<sup>3+</sup>), respectively.

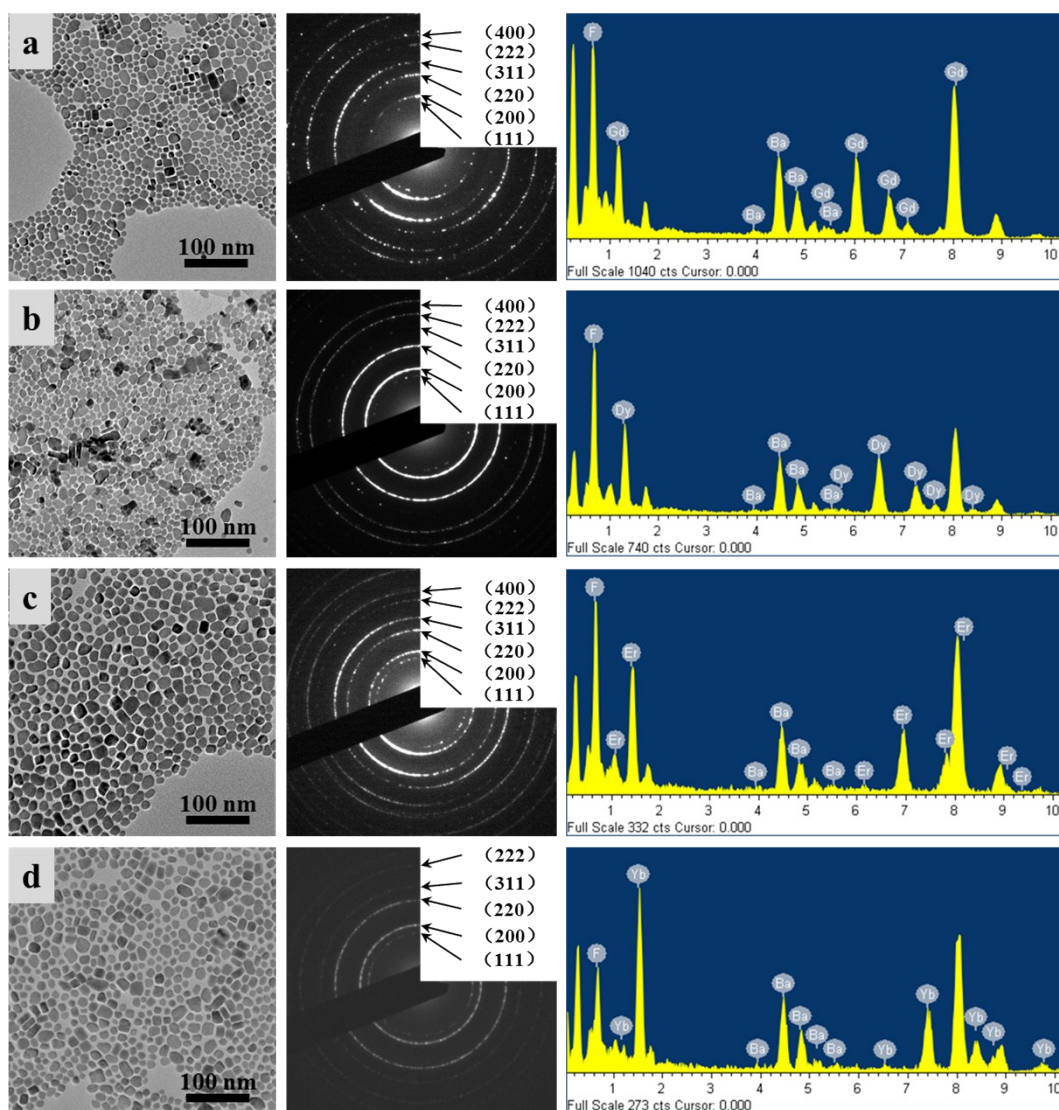

**Figure S2.** Typical TEM images (left panel), SAED patterns (middle panel), and EDS (right panel) of pure (a) BaGdF<sub>5</sub>, (b) BaDyF<sub>5</sub>, (c) BaErF<sub>5</sub>, and (d) BaYbF<sub>5</sub> NPs, respectively.
